# Supplementary material for: A screen printed carbon electrode modified with carbon nanotubes and gold nanoparticles as a sensitive electrochemical sensor for determination of thiamphenicol residue in milk
Source: Royal Society of Chemistry journal article supplement (doi:10.1039/c7ra07544h), 2018-01-01
Supplement: c7ra07544h1.pdf [file c7ra07544h1.pdf]

**Screen Printed Carbon Electrode Modified with Carbon Nanotubes and Gold  
Nanoparticles as a Sensitive Electrochemical Sensor for Determination of Thiamphenicol  
Residue in Milk**

**Supplementary data**

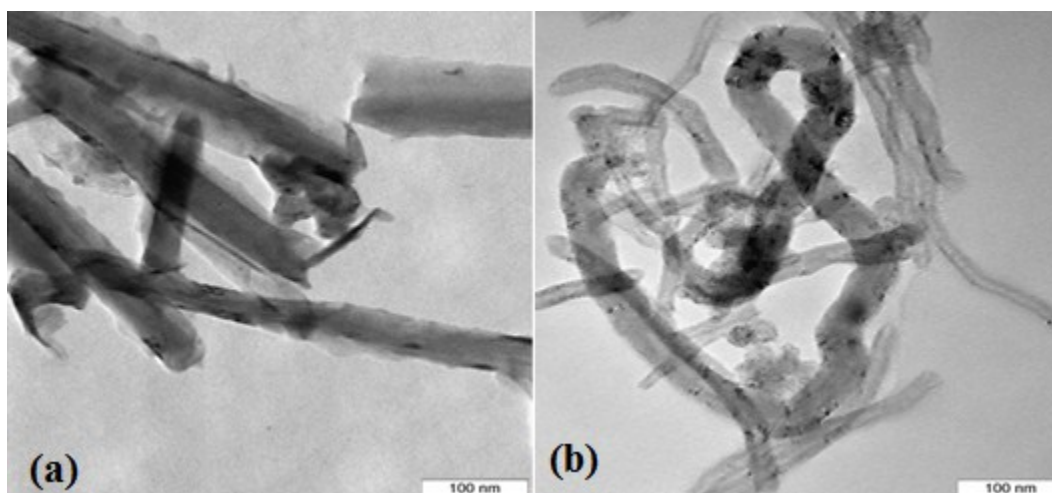

Fig. S1: TEM images of (a) SPE/CNTs and (b) SPE/CNTs/en/AuNPs.
